# Supplementary material for: The Effect of Framing and Normative Messages in Building Support for Climate Policies
Source: PLOS journal article supplement (doi:10.1371/journal.pone.0114335), 2014-12-15

According to the International Energy Agency (IEA), between 2005 and 2009, Australia emitted more than the world's average amount of CO<sub>2</sub> per unit of power generated (measured in grams of carbon dioxide per kilowatt-hour—gCO<sub>2</sub> per kWh).

Australia emitted 884gCO<sub>2</sub> per kWh compared to a global average of 457gCO<sub>2</sub> per kWh (see figure).

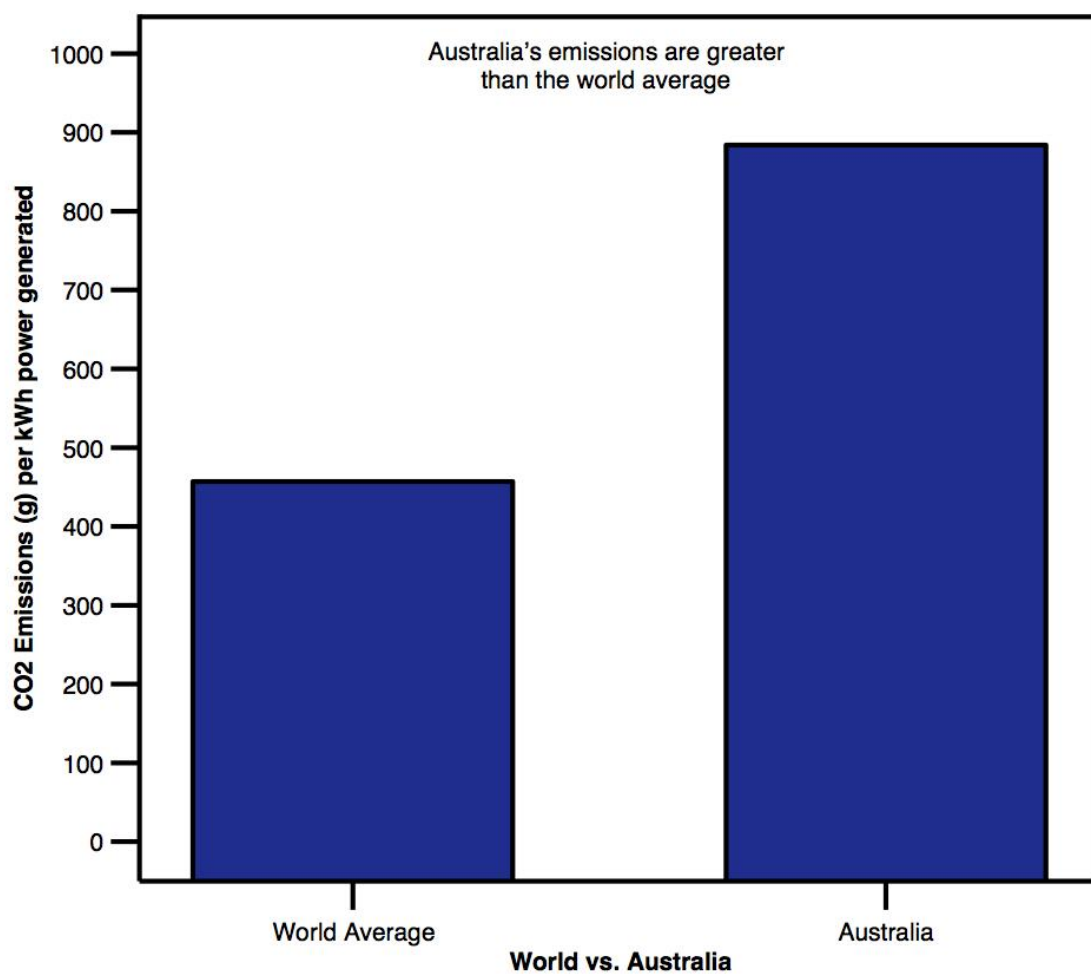

Supplement: S3 (10.1371/journal.pone.0114335.s003) [file journal.pone.0114335.s003]
